# Supplementary material for: Eu, Gd-Codoped Yttria Nanoprobes for Optical and T1-Weighted Magnetic Resonance Imaging
Source: PubMed Central journal article supplement (PMC5333020; doi:10.3390/nano7020035), 2017-02-10
Supplement: nanomaterials-07-00035-s001.pdf [file nanomaterials-07-00035-s001.pdf]

# Supplementary Materials: Eu, Gd-Codoped Ytria Nanoprobes for Optical and T<sub>1</sub>-Weighted Magnetic Resonance Imaging

Timur Sh Atabaev, Jong Ho Lee, Yong Cheol Shin, Dong-Wook Han, Ki Seok Choo, Ung Bae Jeon, Jae Yeon Hwang, Jeong A. Yeom, Hyung-Kook Kim and Yoon-Hwae Hwang

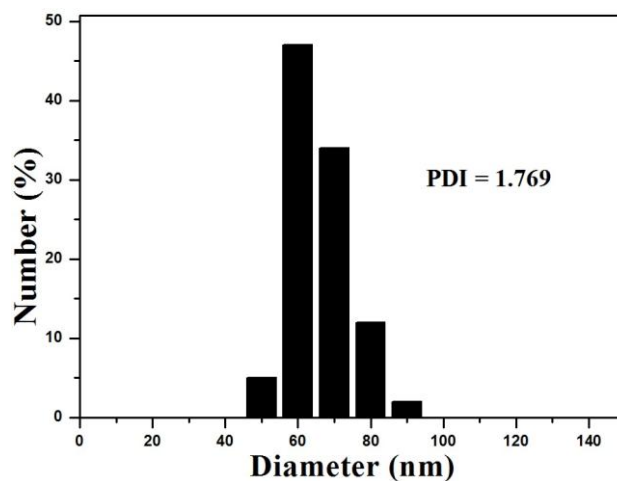

Figure S1. DLS measurements and PDI analysis of 10 mol % Gd<sup>3+</sup> codoped Y<sub>2</sub>O<sub>3</sub>:Eu<sup>3+</sup>.

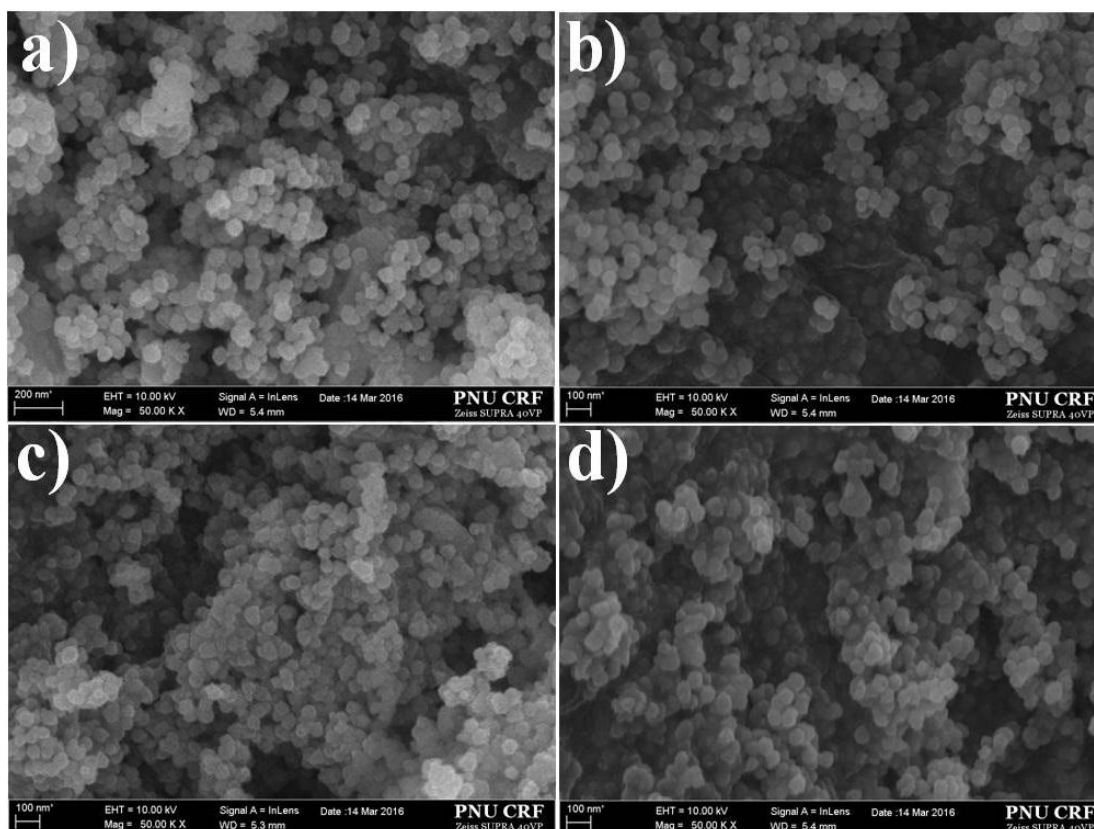

Figure S2. FESEM images of (a) bare Y<sub>2</sub>O<sub>3</sub>:Eu<sup>3+</sup>; (b) 3 mol % Gd<sup>3+</sup> codoped Y<sub>2</sub>O<sub>3</sub>:Eu<sup>3+</sup>; (c) 7 mol % Gd<sup>3+</sup> codoped Y<sub>2</sub>O<sub>3</sub>:Eu<sup>3+</sup>; and (d) 10 mol % Gd<sup>3+</sup> codoped Y<sub>2</sub>O<sub>3</sub>:Eu<sup>3+</sup>.

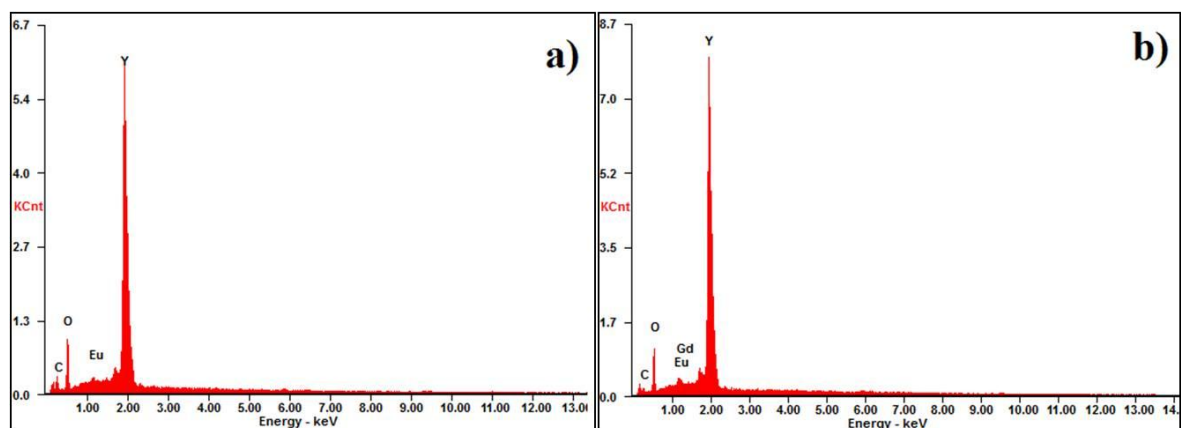

Figure S3. EDX analysis of (a) bare  $\text{Y}_2\text{O}_3:\text{Eu}^{3+}$ ; and (b) 3 mol %  $\text{Gd}^{3+}$  codoped  $\text{Y}_2\text{O}_3:\text{Eu}^{3+}$ .

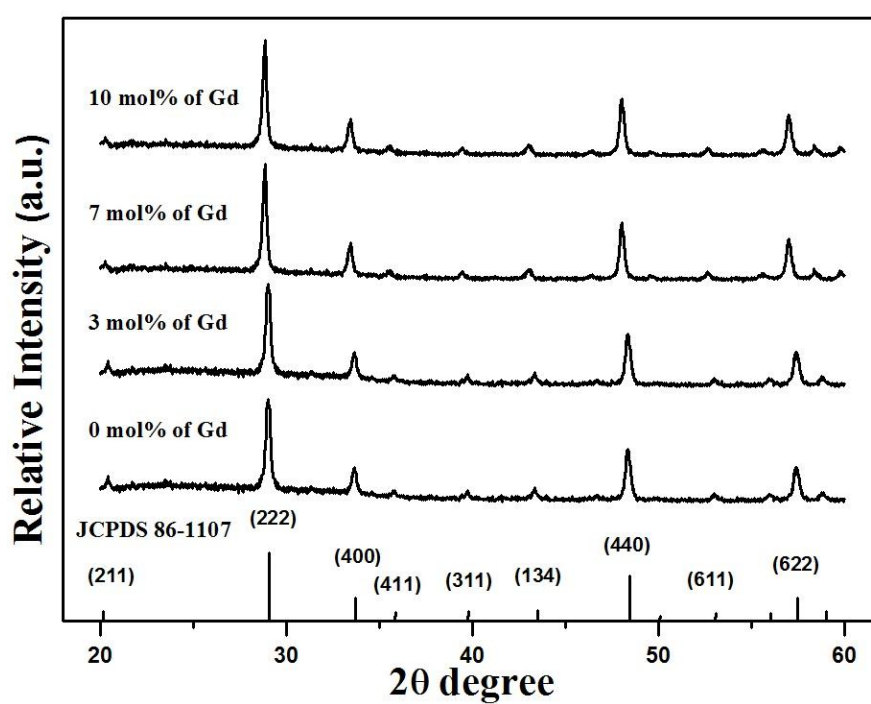

Figure S4. XRD patterns of prepared samples.
